# Supplementary material for: DNA-binding, molecular docking studies and biological activity studies of ruthenium(ii) polypyridyl complexes
Source: Royal Society of Chemistry journal article supplement (doi:10.1039/c7ra05103d), 2017-01-01

**Complex [Ru(ttbp)<sub>2</sub>(PTCP)]<sup>2+</sup>**

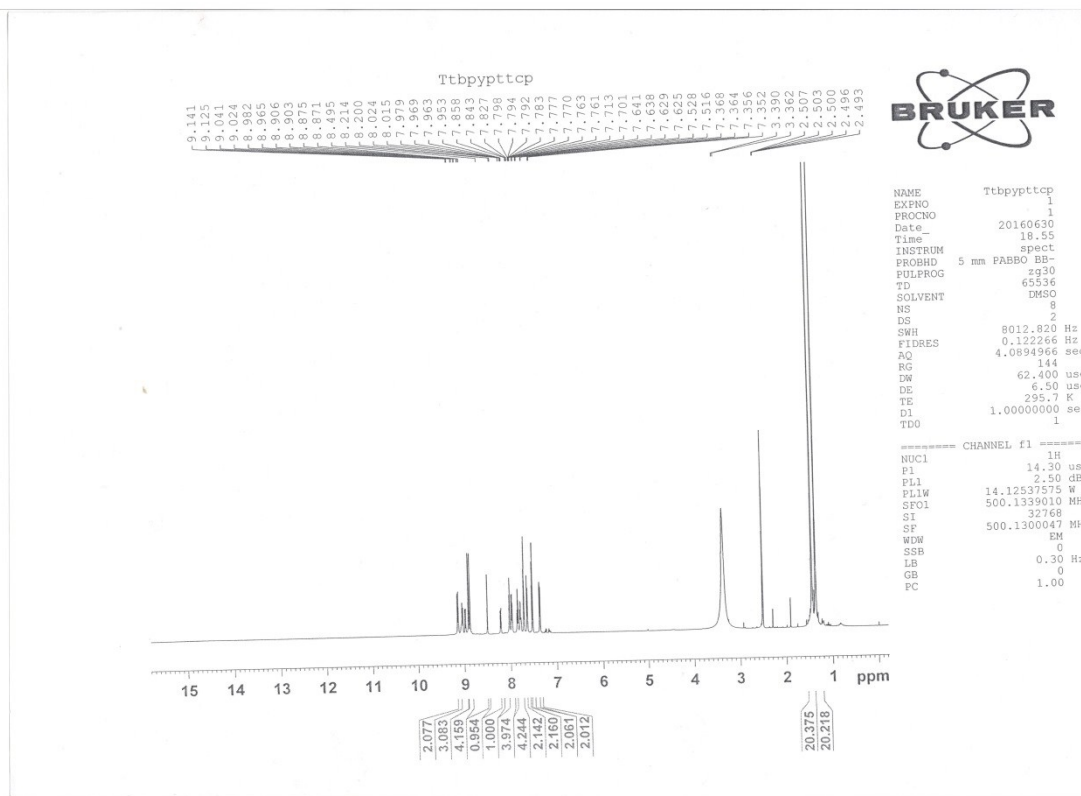

**Fig. S2** <sup>13</sup>C NMR for the complexes  
 Complex [Ru(phen)<sub>2</sub>(PTCP)]<sup>2+</sup>

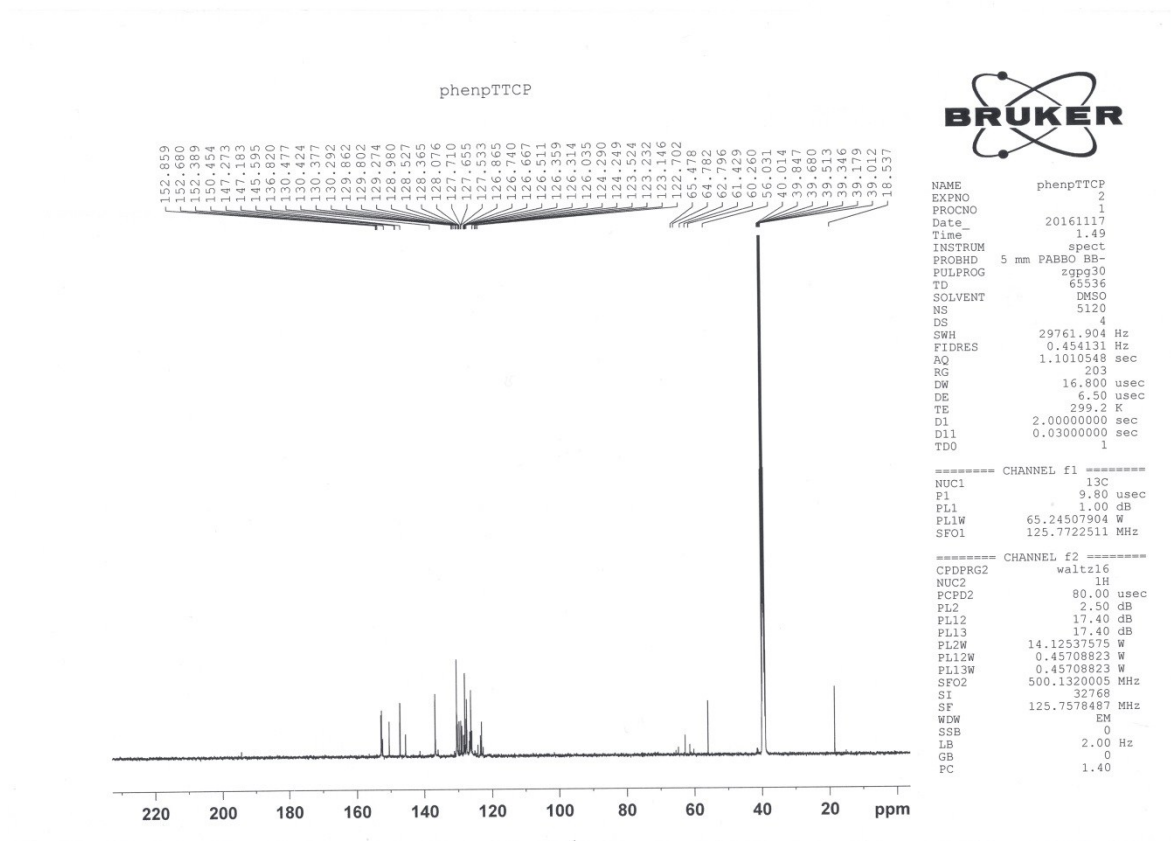

Complex  $[\text{Ru}(\text{dmp})_2(\text{PTCP})]^{2+}$

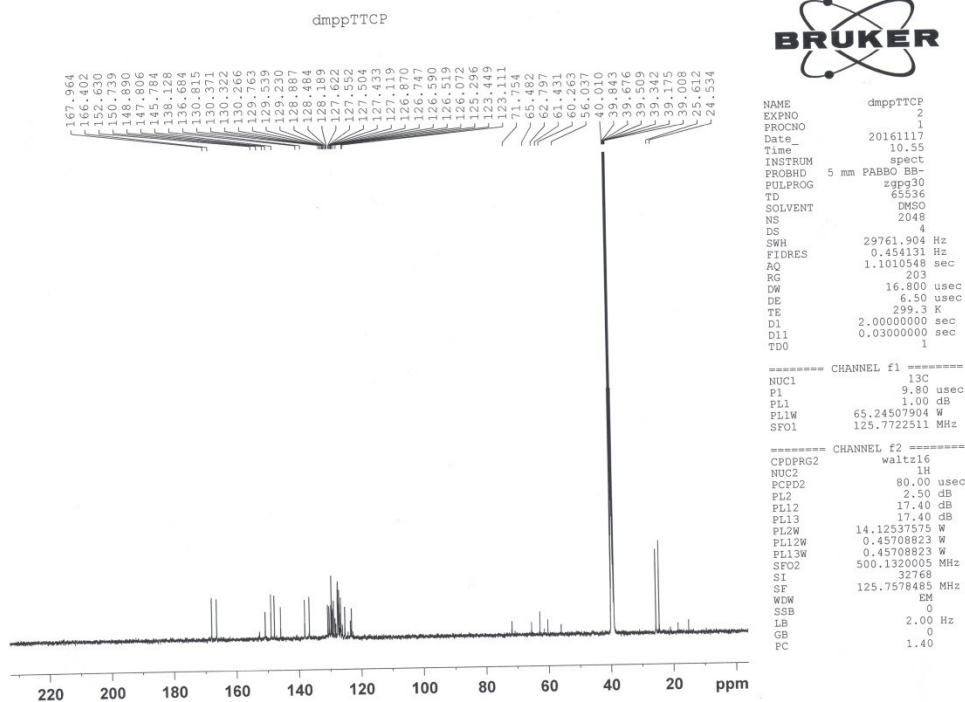

Complex  $[\text{Ru}(\text{tbbpy})_2(\text{PTCP})]^{2+}$

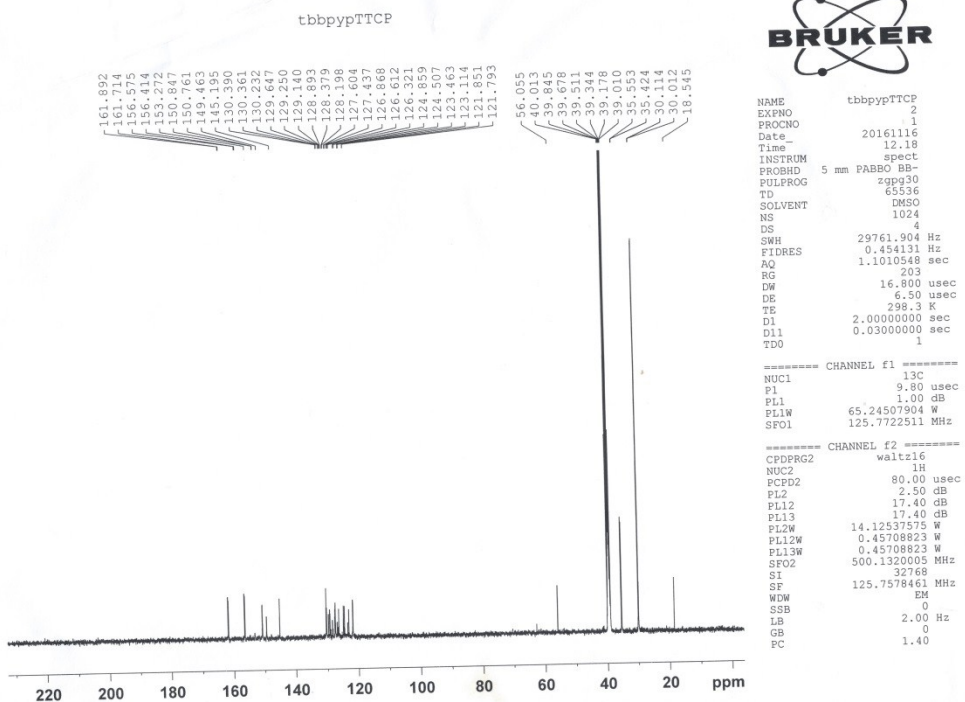

**Fig. S3** ESI-MS for the complexes  
**[Ru(phen)<sub>2</sub>(PTCP)]<sup>2+</sup>**

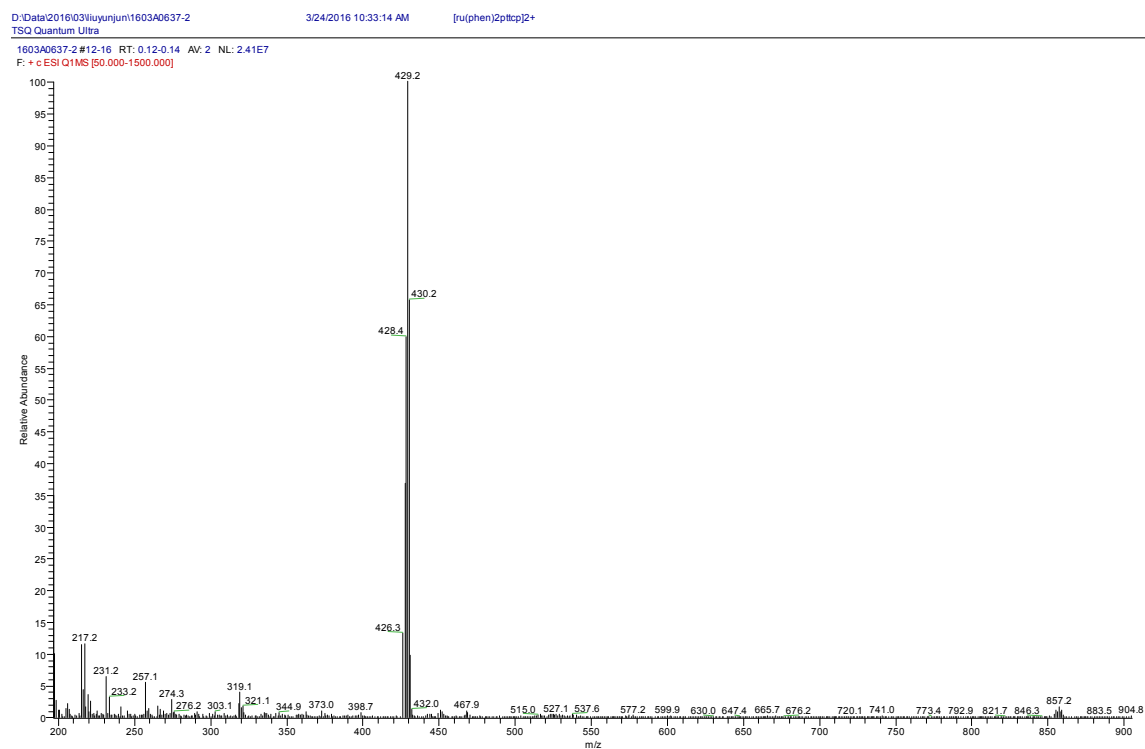

**[Ru(dmp)<sub>2</sub>(PTCP)]<sup>2+</sup>**

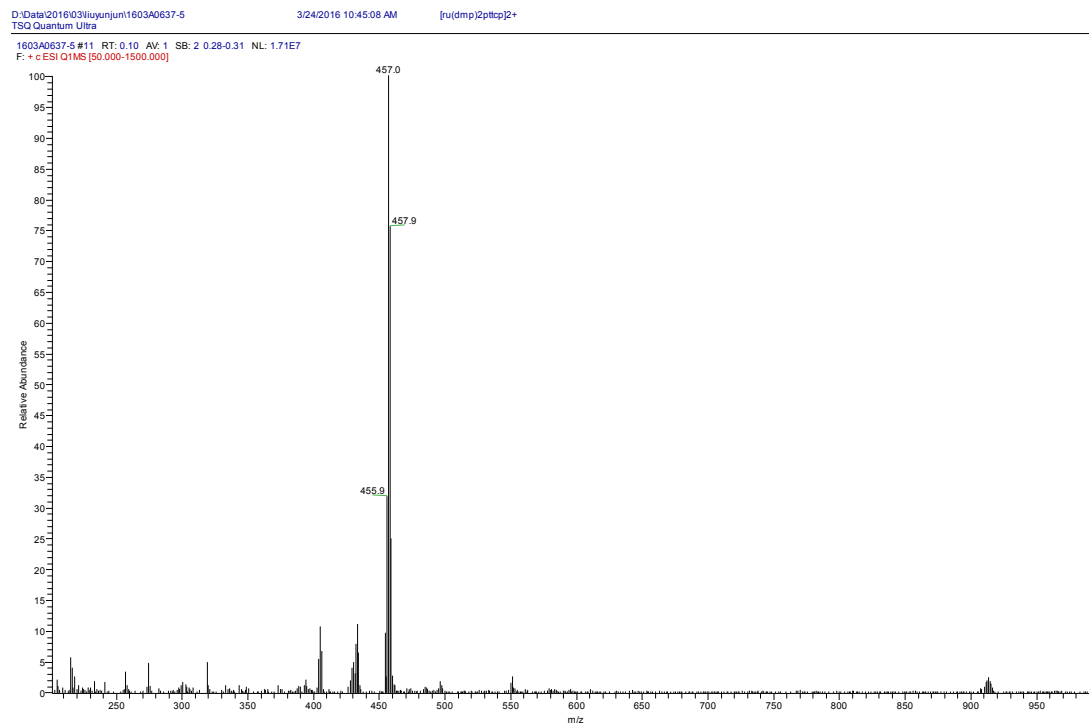

# [Ru(ttbp)<sub>2</sub>(PTCP)]<sup>2+</sup>

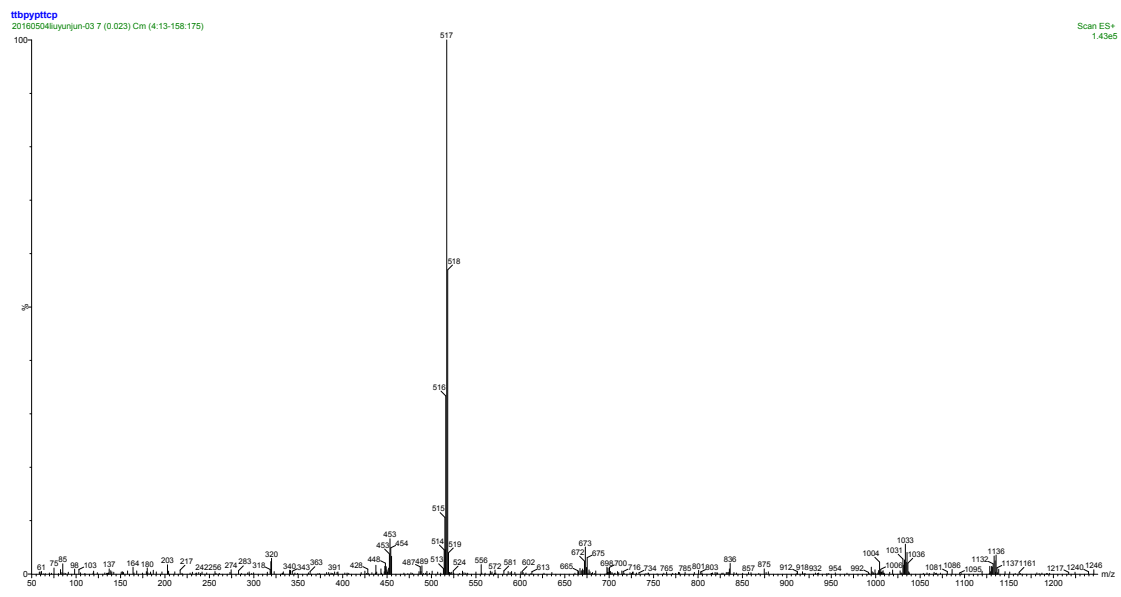

Supplement: c7ra05103d1.pdf [file c7ra05103d1.pdf]
